# Supplementary material for: In situ sulfur deposition route to obtain sulfur–carbon composite cathodes for lithium–sulfur batteries
Source: Royal Society of Chemistry journal article supplement (doi:10.1039/c3ta14459c), 2013-12-20
Supplement: c3ta14459c.pdf [file c3ta14459c.pdf]

## *In situ* sulfur deposition route to obtain sulfur-carbon composite cathodes for lithium-sulfur batteries

W. G. Wang,<sup>a</sup> X. Wang,<sup>a</sup> L. Y. Tian,<sup>a</sup> Y. L. Wang,<sup>\*a</sup> and S. H. Ye<sup>\*a</sup>

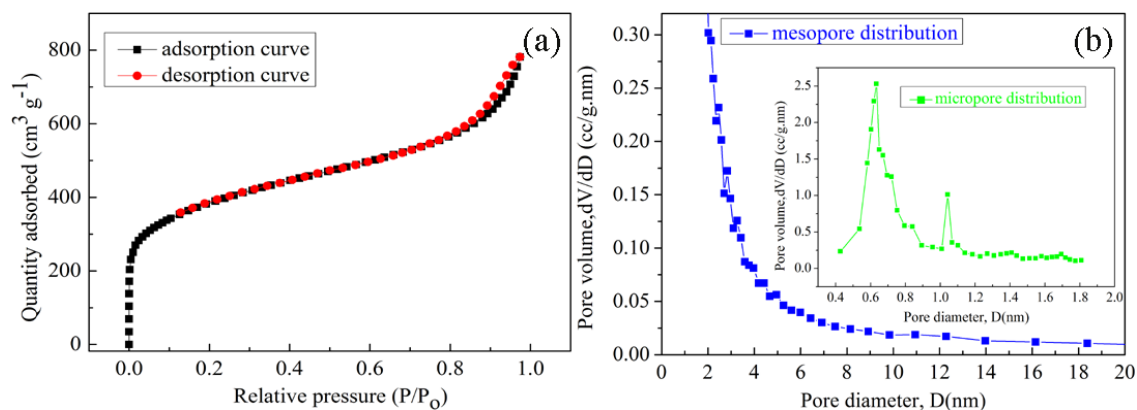

**Fig. S1** BJH of adsorption isothermal curve (a) and BJH mesopore distributions, HK micropore distributions (b) of conductive carbon black.

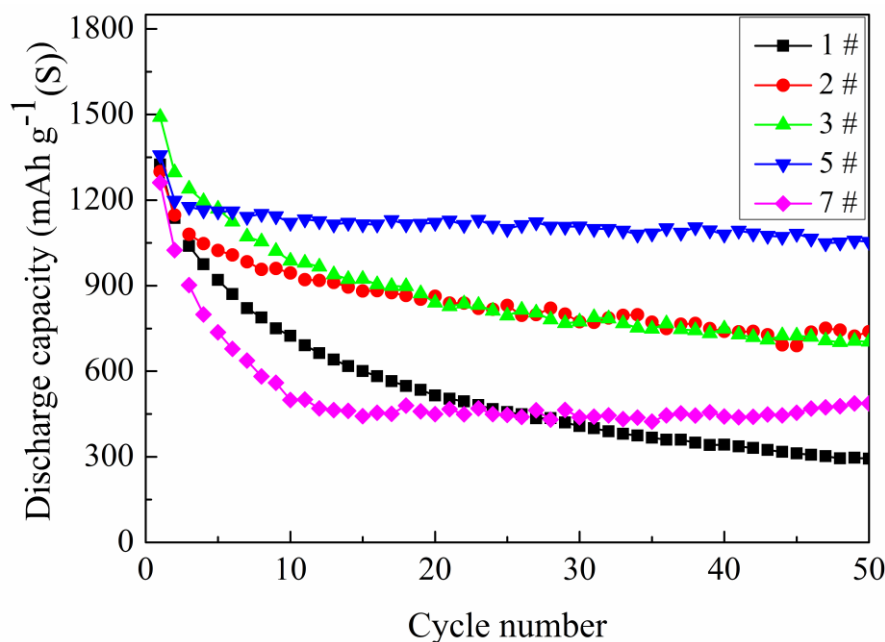

**Fig. S2** Cyclic performance of as-prepared S/CCB composite with 56 wt.% S in different concentration electrolyte (1#: 1 mol·L<sup>-1</sup>, 2#: 2 mol·L<sup>-1</sup>, 3#: 3 mol·L<sup>-1</sup>, 5#: 5 mol·L<sup>-1</sup>, 7#: 7 mol·L<sup>-1</sup>).

Table S1: The fitting data from EIS spectra using the equivalent circuit shown in Fig.10 (d and e)

| Sample        | cycle  | $R_s$ ( $\Omega$ ) | $R_{ct}$ ( $\Omega$ mg) | $Z_w$ ( $\Omega$ mg) | $R_2$ ( $\Omega$ ) |
|---------------|--------|--------------------|-------------------------|----------------------|--------------------|
| 52 wt.% S/CCB | 0      | 8.6                | 424.9                   | 326.3                | -----              |
|               | 1st    | 11.4               | 72.5                    | 148.5                | -----              |
|               | 5th    | 13.5               | 35.1                    | 239.9                | -----              |
|               | 10th   | 14.5               | 28.3                    | 293.4                | -----              |
|               | 50th   | 14.9               | 29.3                    | 232.2                | 57.2               |
|               | 70th   | 16.9               | 32.6                    | 216.3                | 62.1               |
|               | 100 th | 18.5               | 32.9                    | 175.2                | 39.4               |
| 56 wt.% S/CCB | 0      | 22.3               | 433.8                   | 111.5                | -----              |
|               | 1st    | 18.1               | 46.3                    | 111.4                | -----              |
|               | 5th    | 21.3               | 13.8                    | 132.9                | -----              |
|               | 10th   | 20.1               | 13.7                    | 132.8                | -----              |
|               | 50th   | 21.7               | 16.4                    | 162.9                | 21.9               |
|               | 70th   | 22.2               | 19.7                    | 169.5                | 26.6               |
|               | 100th  | 15.4               | 21.6                    | 183.6                | 39.7               |
| 62 wt.% S/CCB | 0      | 12.9               | 446.9                   | 215.2                | -----              |
|               | 1st    | 12.3               | 62.6                    | 392.9                | -----              |
|               | 5th    | 13.4               | 39.7                    | 332.9                | 224.7              |
|               | 10th   | 15.5               | 42.6                    | 85.6                 | 275.0              |
|               | 50th   | 15.6               | 47.1                    | 86.5                 | 399.8              |
|               | 70th   | 17.2               | 53.7                    | 90.2                 | 326.1              |
|               | 100th  | 18.3               | 61.5                    | 148.1                | 184.4              |
